# Supplementary material for: Latent Transforming Growth Factor β-Binding Protein 4 Is Downregulated in Esophageal Cancer via Promoter Methylation
Source: PubMed Central journal article supplement (PMC3669142; doi:10.1371/journal.pone.0065614), 2013-05-31
Supplement: pone.0065614.s001.pdf [file pone.0065614.s001.pdf]

# **Latent transforming growth factor $\beta$ -binding protein 4 is downregulated in esophageal cancer via promoter methylation**

Insa Bultmann<sup>1\*</sup>, Anne Conradi<sup>1\*</sup>, Celine Kretschmer<sup>2</sup>, Anja Sterner-Kock<sup>1#</sup>

<sup>1</sup>Center for Experimental Medicine, Medical Faculty, University of Cologne, Cologne, Germany

<sup>2</sup>Med. Klinik Hepatologie & Gastroenterologie, Charité Berlin, Berlin, Germany.

\* These authors contributed equally to this work.

# E-mail: anja.sterner-kock@uk-koeln.de

## **Supporting Information S1. Supporting Tables and Figures.**

### **Table S1. Used antibodies.**

(Material and Methods: Tissue microarrays, immunohistochemical staining and scoring; Immunofluorescence; SDS-PAGE and Immunoblotting)

### **Table S2. Used PCR primers.**

(Material and Methods: Methylation analysis; Luciferase reporter gene assay; Transfection and migration assay)

### **Table S3. Used qPCR primers.**

(Material and Methods: RNA Expression Analysis)

### **Figure S1. LTBP4 expression in normal esophageal tissue.**

(Results: LTBP4 is downregulated in different stages of esophageal cancer progression)

### **Figure S2. LTBP4 expression in OE33 and KYSE180 cells before and after re-expression of LTBP4.**

(Results: Re-expression of LTBP4 in esophageal carcinoma cell lines reduces cell migration ability)

### **Figure S3. Highly methylated CpGs and potential transcription factor binding sites in CpG island I.**

(Results: Identification of potential transcription factors for LTBP4L and LTBP4S)

### **Figure S4. Highly methylated CpGs and potential transcription factor binding sites in CpG island II.**

(Results: Identification of potential transcription factors for LTBP4L and LTBP4S)

### **Figure S5. Highly methylated CpGs and potential transcription factor binding sites in CpG island IV.**

(Results: Identification of potential transcription factors for LTBP4L and LTBP4S)

### **Figure S6. Expression analysis of Gata1, SP1, SMAD3 and E2F4 after transfection with expression vectors.**

(Results: Identification of potential transcription factors for LTBP4L and LTBP4S; Material and Methods: Luciferase reporter gene assay)

**Table S1. Used antibodies.**

|                                            |                                             |
|--------------------------------------------|---------------------------------------------|
| LTBP4 -<br>Immunohistochemical<br>staining | H-293, Santa Cruz Biotechnologies, USA      |
| LTBP4 -<br>Western Blot                    | GTX101725, GeneTex, USA                     |
| GAPDH                                      | #2118, Cell Signaling, USA                  |
| c-Myc                                      | IMG-6824A, Biomol, Germany                  |
| Gata1                                      | #3535, Cell Signaling, USA                  |
| SP1                                        | #9389, Cell Signaling, USA                  |
| E2F4                                       | ABIN483876 , antikoerper-online.de, Germany |
| SMAD3                                      | #9523, Cell Signaling, USA                  |

**Table S2. Used PCR primers.**

|                                   |                        |                                     |
|-----------------------------------|------------------------|-------------------------------------|
| LTBP4L promoter                   | for ( <i>Bgl</i> II)   | AAG ATC TGA ACT CCT GAC CTC ATG ATC |
|                                   | rev ( <i>Hind</i> III) | CTA AGC TTG AAG AGC GGC AGC AAC AG  |
| LTBP4S promoter                   | for ( <i>Bgl</i> II)   | AAG ATC TCG TTG TAG CTC AGC ACC CA  |
|                                   | rev ( <i>Hind</i> III) | CTA AGC TTC AGC AGC ACC AAT AGC GAC |
| LTBP4 cloning primers             | for ( <i>Bam</i> HI)   | AGT GCG GGA TCC TGG ACG             |
|                                   | rev ( <i>Xba</i> I)    | GCA ATC TAG AGT CGA GTC GGG CCC     |
| CpG I<br>-methylation specific    | for                    | GTG AAT TTG GGA TTT TTA GAG G       |
|                                   | rev                    | CAA TCA AAA AAC AAC AAA AAC AAA T   |
| CpG II<br>-methylation specific   | for                    | TTG TTG GTG TTG TTG TTG             |
|                                   | rev                    | CCC TAC CCC AAT AAA CTA AA          |
| CpG III<br>-methylation specific  | for                    | CCT ATA GAT CTG GGG GCT ATA GG      |
|                                   | rev                    | GAG GCT CCC CAC CAG ATG GCC TCA T   |
| CpG IV<br>-methylation specific   | for                    | GAT TAT TGA GAA GGA GGT TTT TAT AG  |
|                                   | rev                    | CCC CAC AAT CTT AAA CAT TTA ATA C   |
| CpG V<br>-methylation specific    | for                    | TAT TAT TTT TAA TGG ATT TTT TTT TT  |
|                                   | rev                    | CCC CCT CCT CAC CAC TCC             |
| CpG VI<br>-methylation specific   | for                    | GTT AGG GTT GTA GTT TGG ATT GG      |
|                                   | rev                    | AAA ATC TAA ACT CCC TCT CCC TAA A   |
| CpG VII<br>-methylation specific  | for                    | TTG TTT TTA GTT GTT TTT TGT AGT TT  |
|                                   | rev                    | CCC CTA ACT ATA CCC CCT TTA TAA C   |
| CpG VIII<br>-methylation specific | for                    | GGT AAG TTT TGT TAG TTG TAT TTT T   |
|                                   | rev                    | ATA AAA TTA TCA CCA CTC CCC AAC     |

**Table S3. Used qPCR primers.**

|                                      |       |                                   |
|--------------------------------------|-------|-----------------------------------|
| LTBP4                                | for   | GCT GCC CTG TGT GAA AAT GTC       |
|                                      | rev   | GGG AAC GTG CCA GCA GAA           |
|                                      | probe | AAC AGC CCG GAA GAG TTT GAC CCC A |
| LTBP4 -<br>external control          | for   | GGC TGG AGT GCG TTG ATA AT        |
|                                      | rev   | AGG GGT CGT AGG GTA GCA CT        |
| TGF- $\beta$ 1                       | for   | GTA CCT GAA CCC GTG TTG CT        |
|                                      | rev   | GTA TCG CCA GGA ATT GTT GC        |
|                                      | probe | TAA AAG TGG AGC AGC ACG TG        |
| TGF- $\beta$ 1 -<br>external control | for   | TCG CCC TGT ACA ACA GCA           |
|                                      | rev   | GAA CCC GTT GAT GTC CAC TT        |

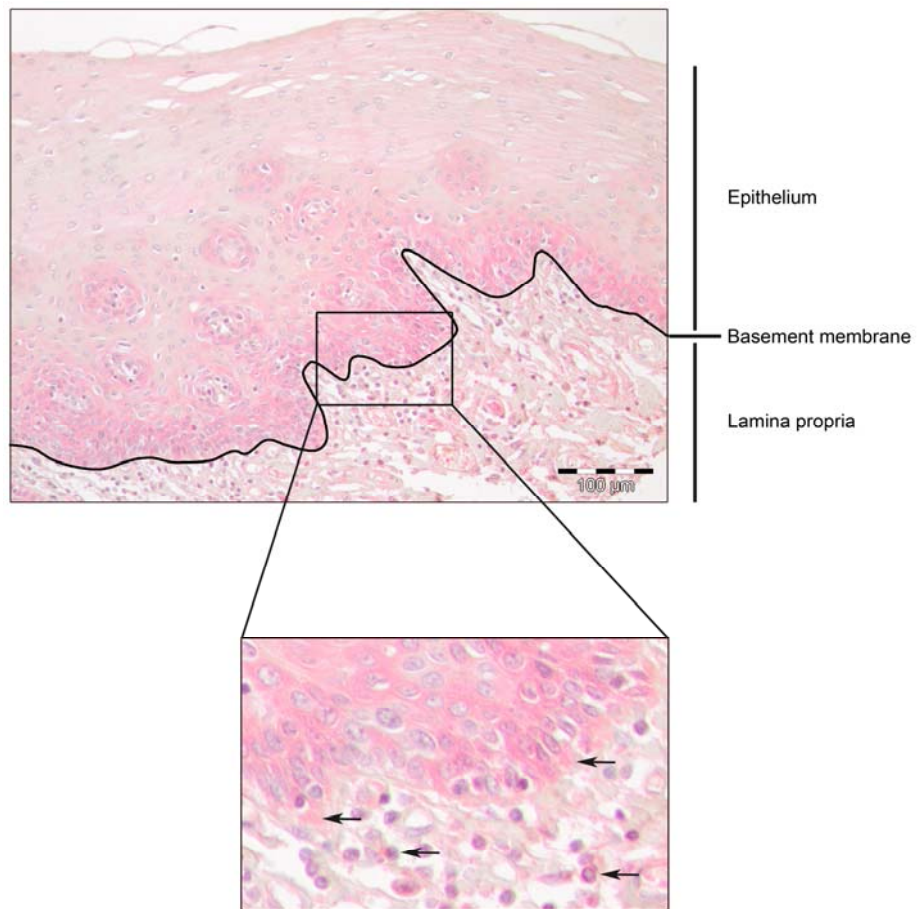

**Figure S1. LTBP4 expression in normal esophageal tissue.**

Immunohistochemical evaluation of LTBP4 expression (red immunoreactivity) in normal esophageal tissue. Normal esophageal tissue clearly demonstrated LTBP4 expression in esophageal epithelial cells and less prominently in resident lymphocytes within the lamina propria (black arrows). Bar graph: 100 μm.

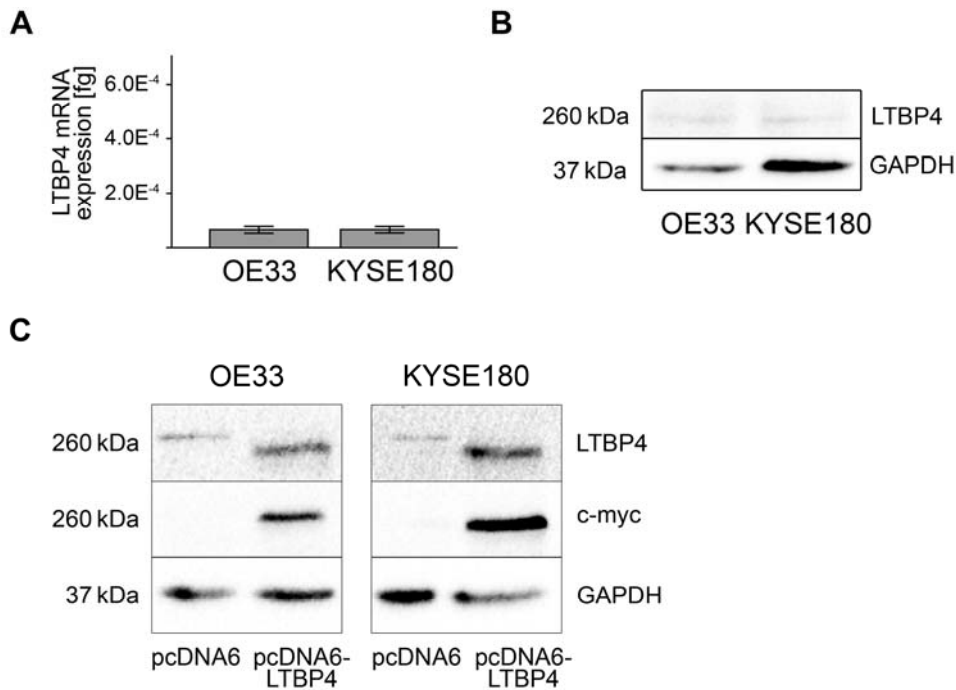

**Figure S2. LTBP4 expression in OE33 and KYSE180 cells before and after re-expression of LTBP4.**

A) Amount of LTBP4 mRNA measured in fg in the esophageal adenocarcinoma cell line OE33 and the esophageal squamous cell carcinoma cell line KYSE180. The amount of mRNA was assessed by qPCR. B) Western Blot analysis of LTBP4 and GAPDH in OE33 and KYSE180 cells. C) Western Blot analysis of LTBP4, c-myc and GAPDH in OE33 and KYSE180 cells after pcDNA6 as a control or pcDNA6-LTBP4 transient transfection.

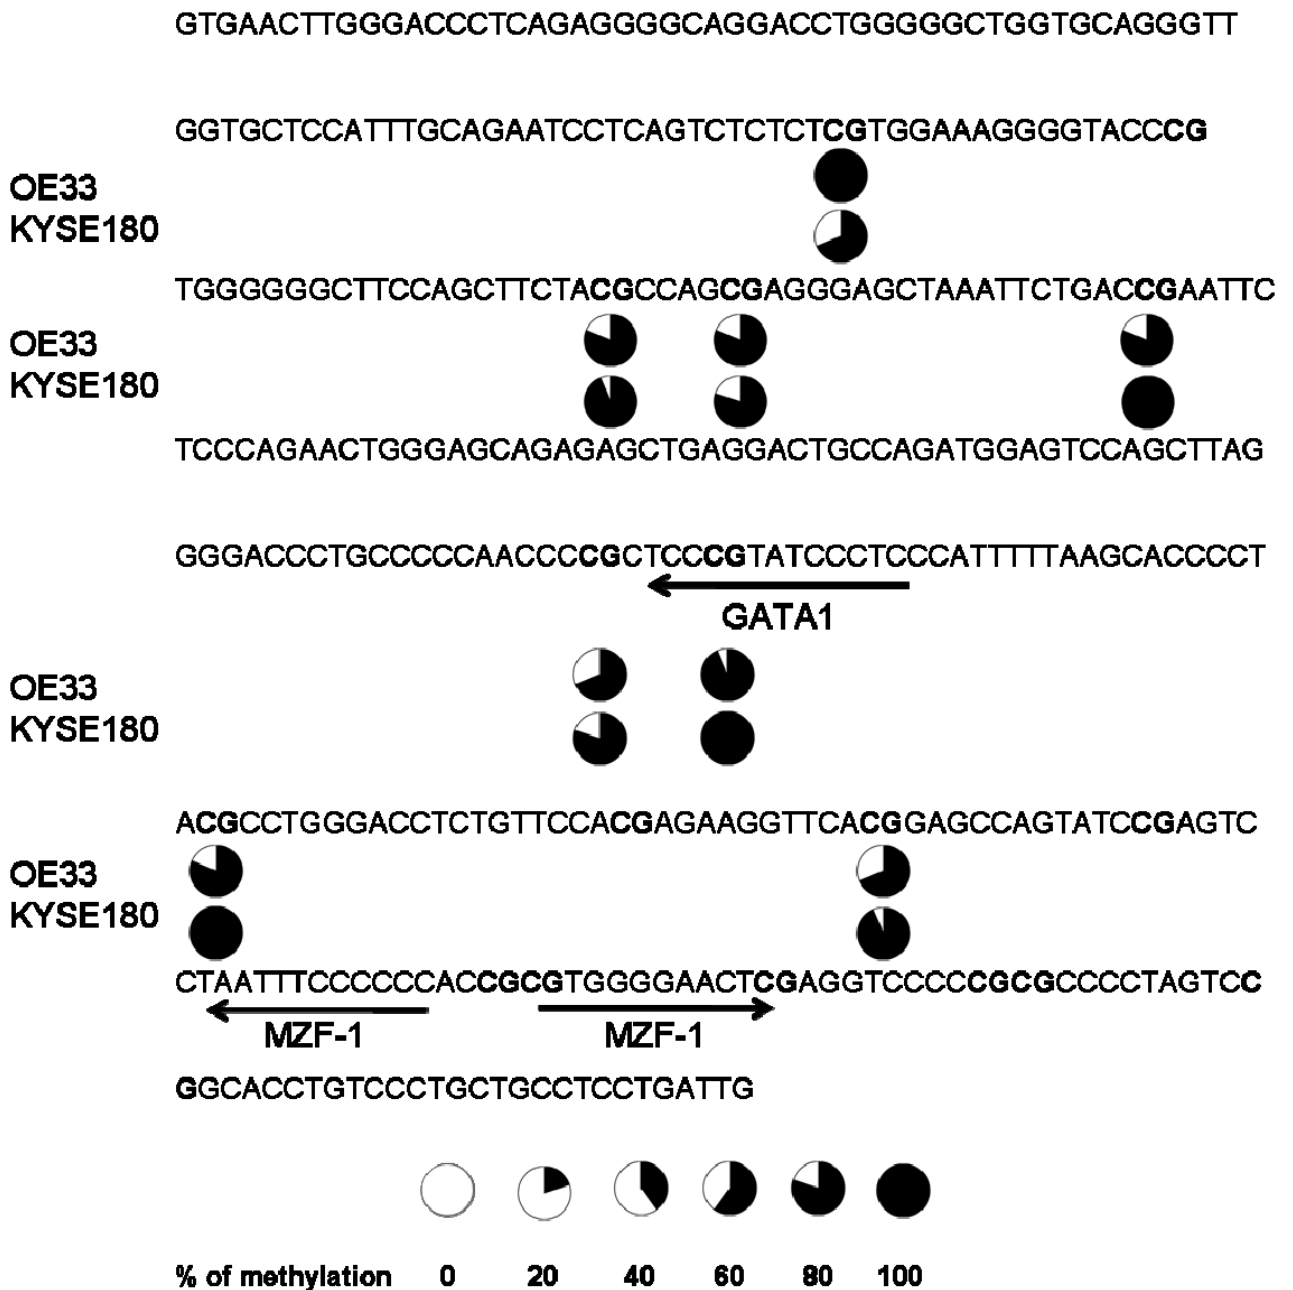

**Figure S3. Highly methylated CpGs and potential transcription factor binding sites in CpG island I.**

*In silico* analysis of the DNA sequence of CpG island I within the putative LTBP4L promoter identified a highly methylated binding site for GATA1 in OE33 and KYSE180 cells. Two putative binding sites for MZF-1 were not methylated. The methylation status was analyzed by clonal bisulfite sequencing and at least ten clones were sequenced for each cell line. The percentage of methylation is visualized as pie chart.

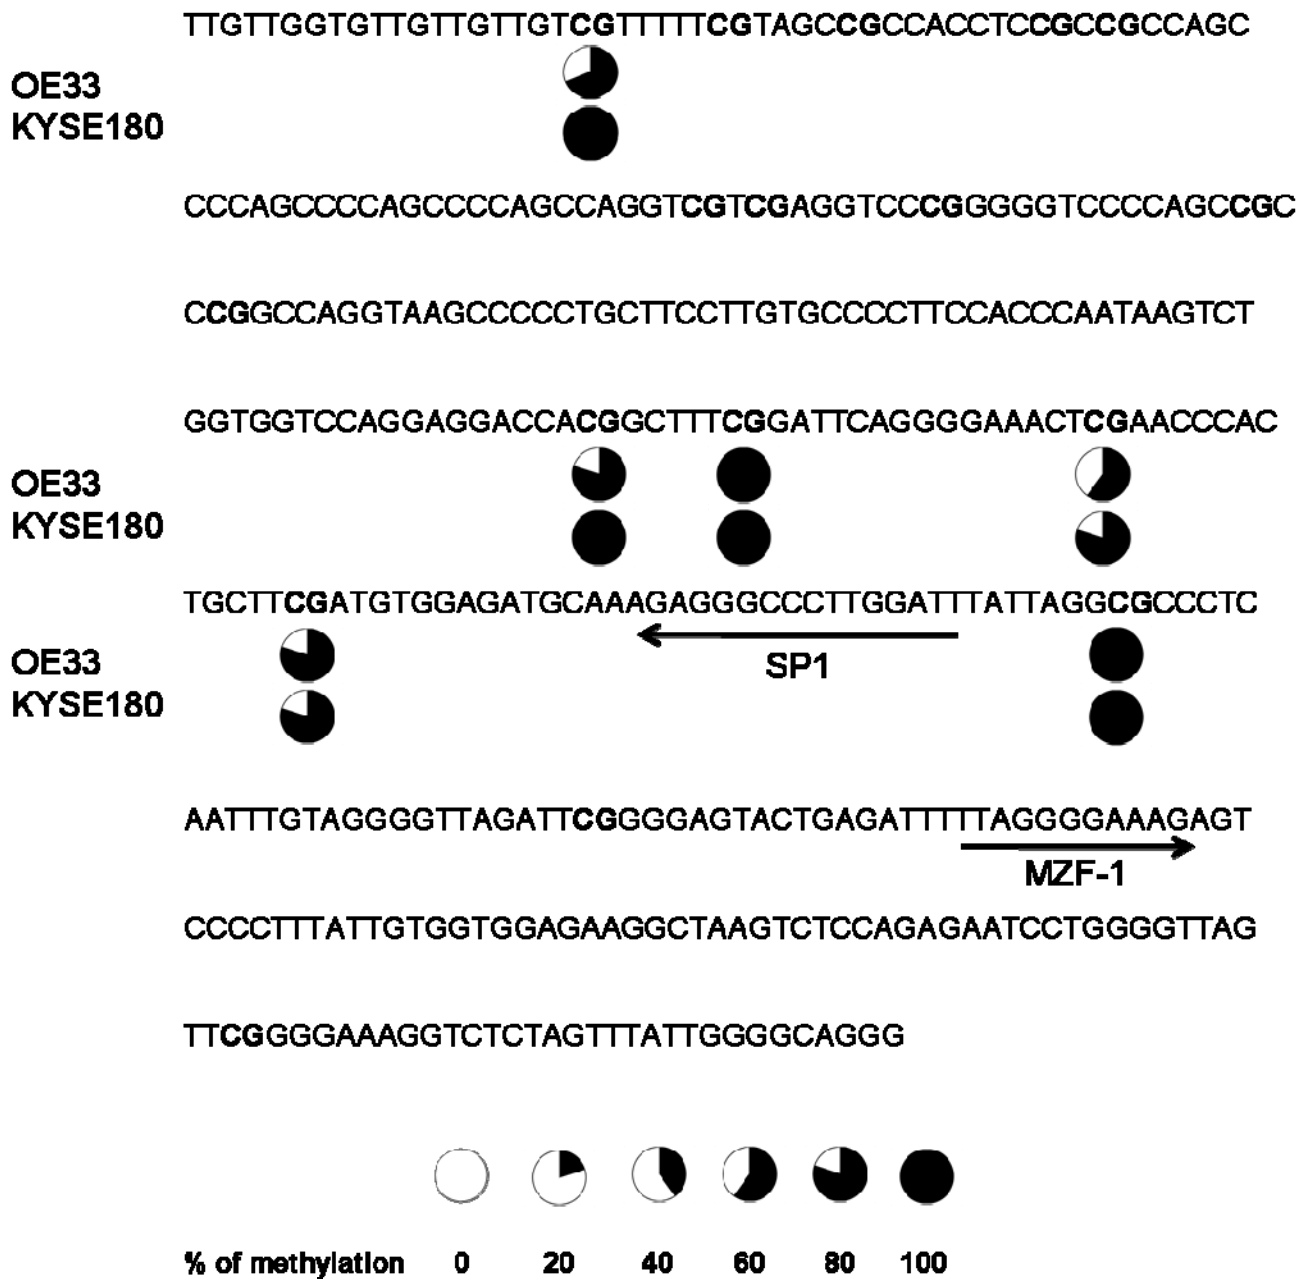

**Figure S4. Highly methylated CpGs and potential transcription factor binding sites in CpG island II.**

*In silico* analysis of the DNA sequence of CpG island II within the putative LTBP4L promoter identified not methylated binding sites for SP1 and MZF1 in OE33 and KYSE180 cells. The methylation status was analyzed by clonal bisulfite sequencing and at least ten clones were sequenced for each cell line. The percentage of methylation is visualized as pie chart.





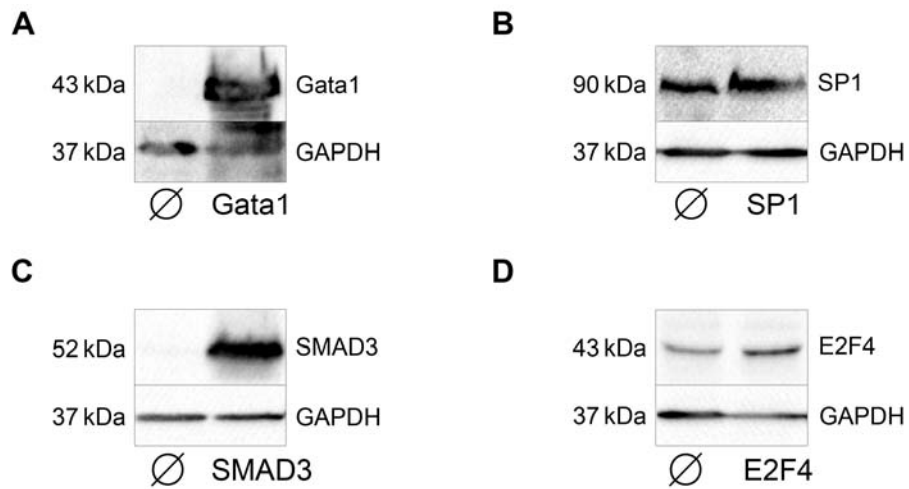

**Figure S6. Expression analysis of Gata1, SP1, SMAD3 and E2F4 after transfection with expression vectors.**

Western Blot analysis of HEK293 cells after transfection with A) a Gata1 expression vector, B) a SP1 expression vector, C) a SMAD3 expression vector or D) an E2F4 expression vector in comparison to non-transfected cells (Ø).
